# Supplementary material
Source: MDPI journal article supplement (https://www.mdpi.com/2076-3417/12/1/22)
Supplement: s1 [file s1]

Article

# Assessing the electrochemical performance of different nanostructured CeO<sub>2</sub> samples as anodes for lithium-ion batteries

Farah Lamara, Nedjemeddine Bounar, Benjamín Solsona, Francisco J. Llopis, M.Pilar Pico, Daniel Alonso-Domínguez, M. Luisa López and Inmaculada Álvarez-Serrano

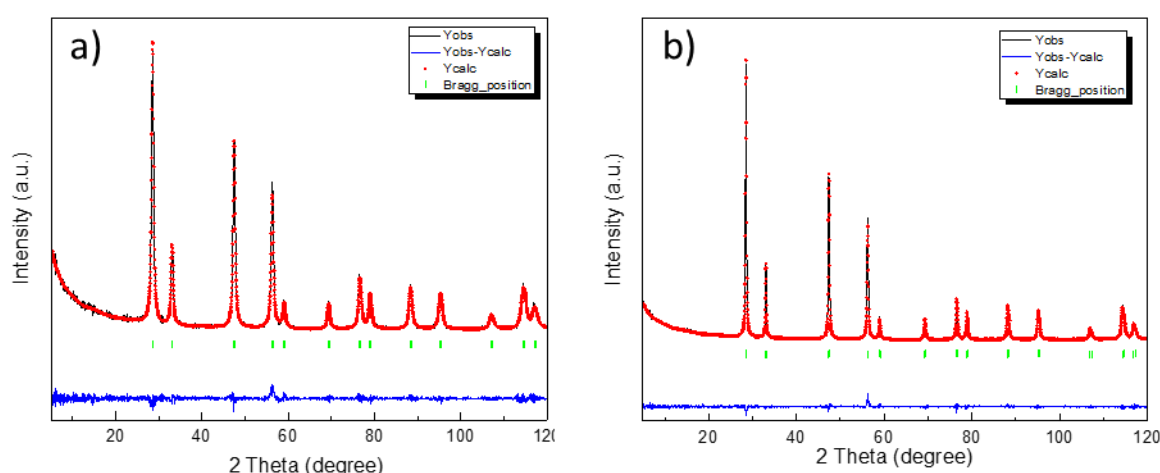

**Figure S1.** Rietveld profiles for a) Ce-pH7 and b) Ce-pH-13. Red points refer to the experimental data, black lines to the calculated profile, blue line indicate the difference between them and vertical green lines indicate the Bragg reflections.

**Table S1.** Rietveld factors from the refinements for the ceria anodes.

| Notation | R <sub>p</sub> | R <sub>wp</sub> | R <sub>B</sub> |
|----------|----------------|-----------------|----------------|
| Ce-pH13  | 7.18           | 11.2            | 1.86           |
| Ce-pH7   | 7.80           | 11.5            | 1.14           |
| Ce-ox    | 6.65           | 8.72            | 1.33           |
| Ce-PMMA  | 3.90           | 5.94            | 1.15           |
| Ce-CMK3  | 5.74           | 7.86            | 2.69           |
| Ce-Ref   | 3.32           | 5.46            | 1.72           |

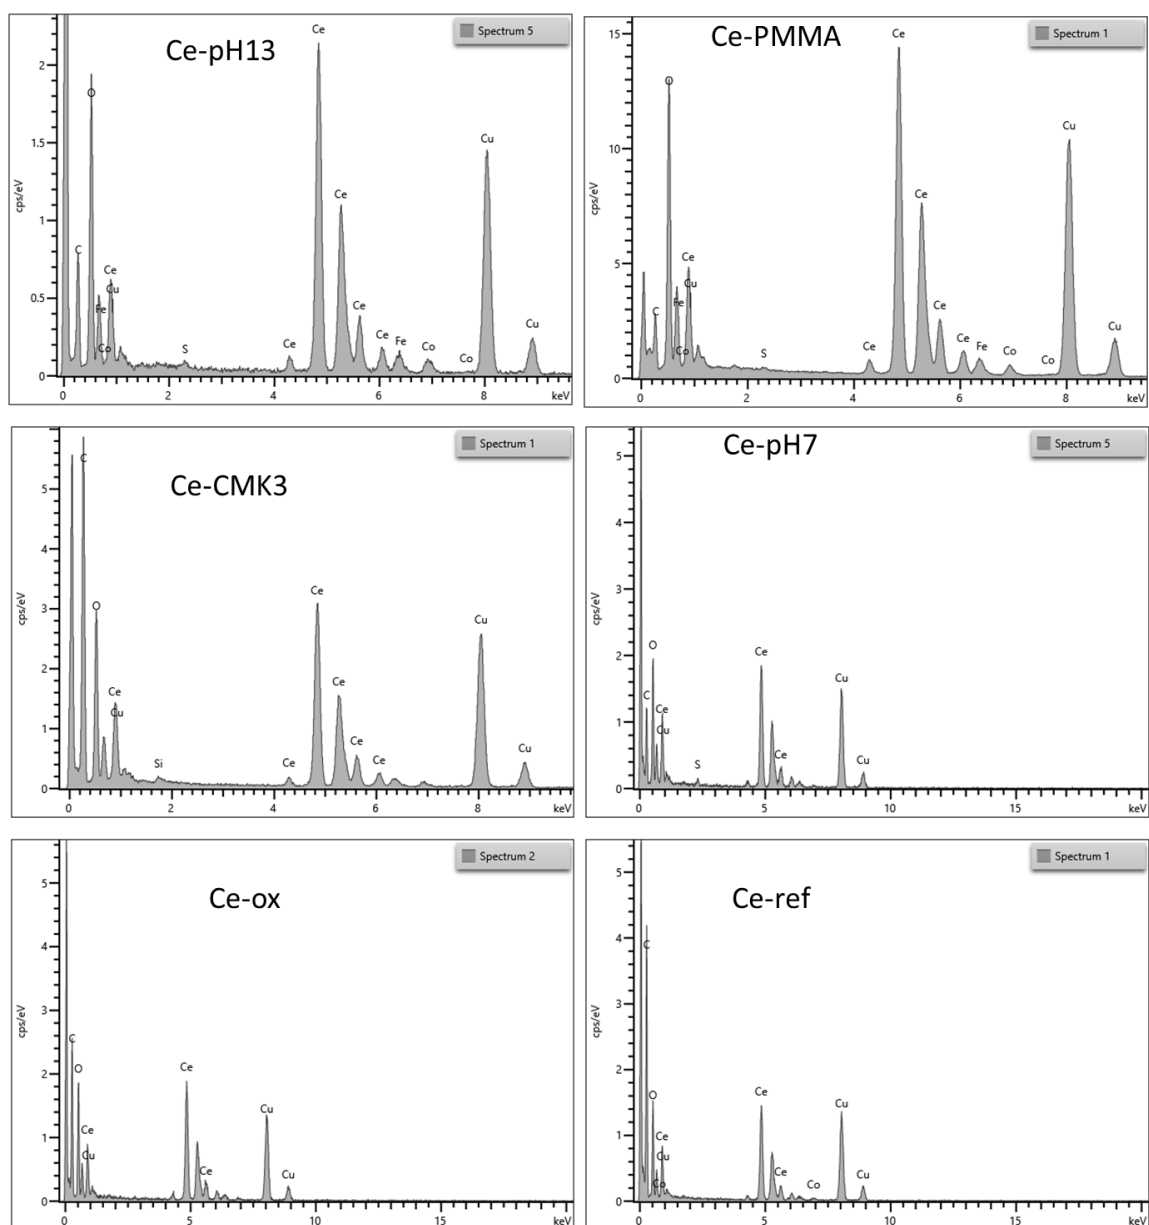

**Figure S2.** Representative EDX spectra for the ceria anodes.

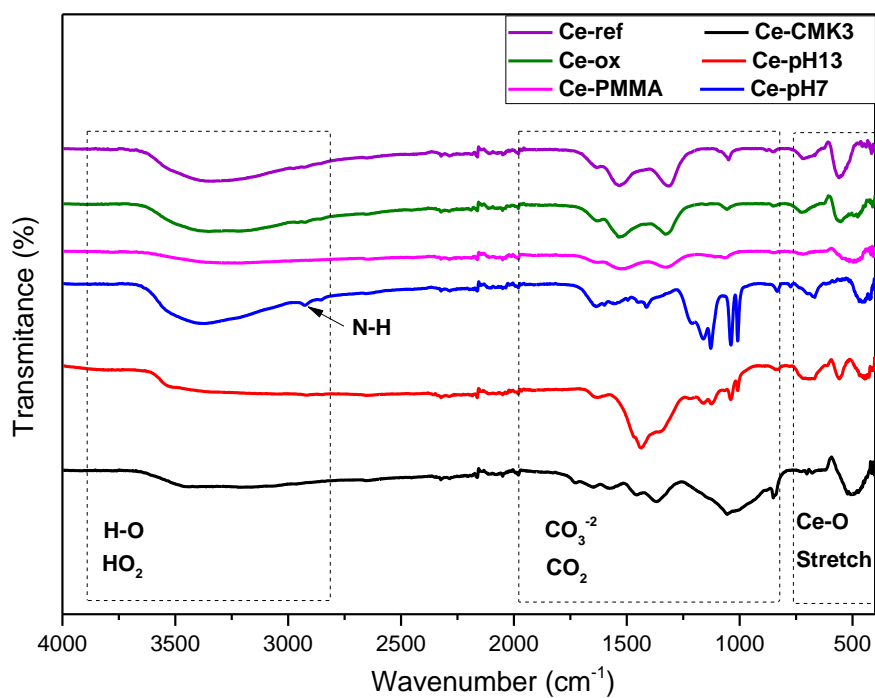

**Figure S3.** Representative FTIR spectra for the ceria anodes.

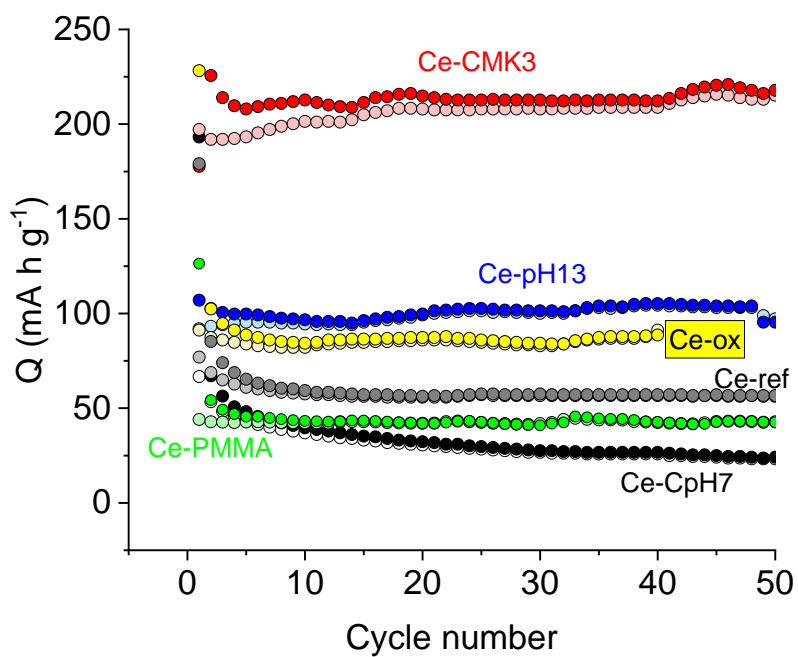

**Figure S4.** Comparative of charge (pale color) and discharge (intense color) capacity values during the first 50 cycles at 0.155 A g<sup>-1</sup> current rate for all the ceria anodes.
